# Supplementary material for: The in vitro effects of azithromycin and clarithromycin on promastigotes and amastigotes of Leishmania tropica.
Source: MDPI journal article supplement (doi:10.3390/jcm13061635), 2012-01-01
Supplement: s1 [file s1]

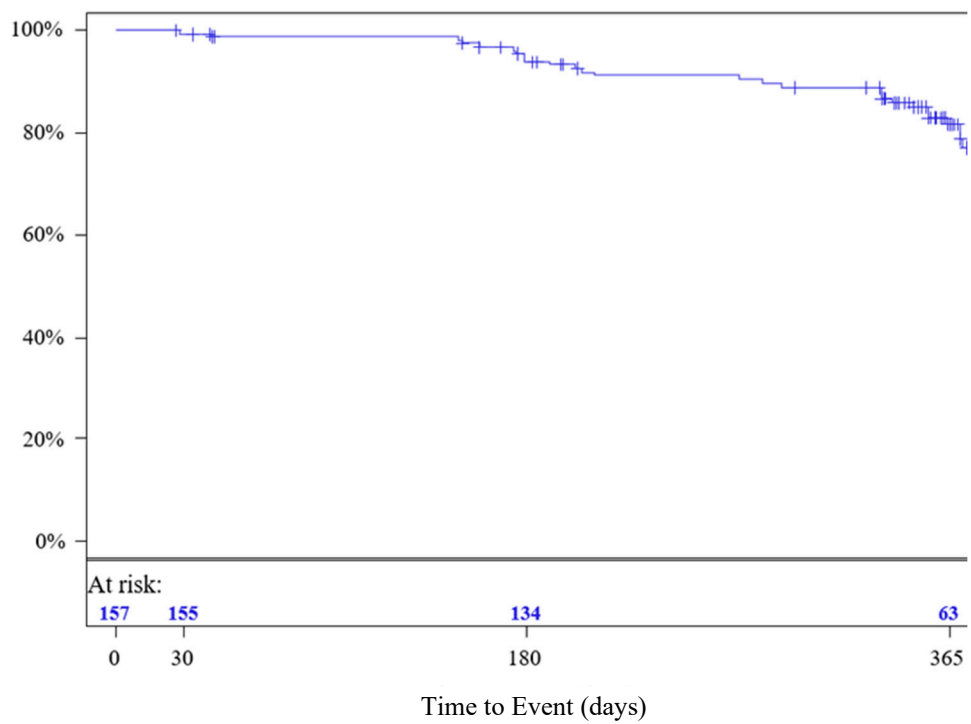

| Description         | Day 0               | Day 30            | Day 180           | Day 365           |
|---------------------|---------------------|-------------------|-------------------|-------------------|
| At risk             | 157                 | 155               | 134               | 63                |
| Events              | 0                   | 1                 | 9                 | 24                |
| censored            | 0                   | 1                 | 14                | 73                |
| Survival (estimate) | 100.0 [100.0,100.0] | 99.4 [95.5, 99.9] | 93.9 [88.6, 96.8] | 81.6 [73.6, 87.4] |
| SE                  | 0.00000             | 0.00639           | 0.01966           | 0.03484           |

**Figure S1.** Kaplan-Meier estimates for primary patency over 12 months (investigator-reported).

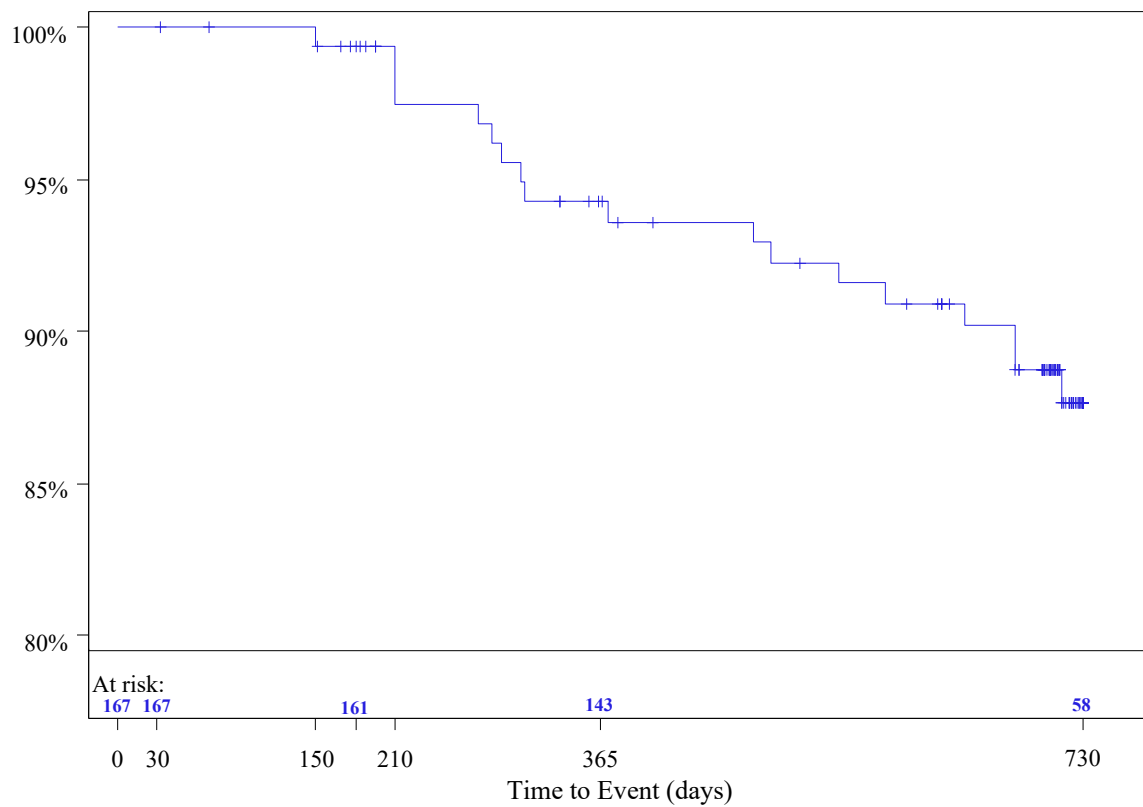

| Description         | Day 0               | Day 30              | Day 180           | Day 365           | Day 730           |
|---------------------|---------------------|---------------------|-------------------|-------------------|-------------------|
| At risk             | 167                 | 167                 | 161               | 143               | 58                |
| Events              | 0                   | 0                   | 1                 | 9                 | 18                |
| Censored            | 0                   | 0                   | 5                 | 15                | 93                |
| Survival (estimate) | 100.0 [100.0,100.0] | 100.0 [100.0,100.0] | 99.4 [95.8, 99.9] | 94.3 [89.3, 97.0] | 87.7 [81.0, 92.1] |
| SE                  | 0.00000             | 0.00000             | 0.00604           | 0.01857           | 0.02770           |

**Figure S2.** Kaplan Meier curve for freedom from clinically driven target lesion revascularisation over 24 months.

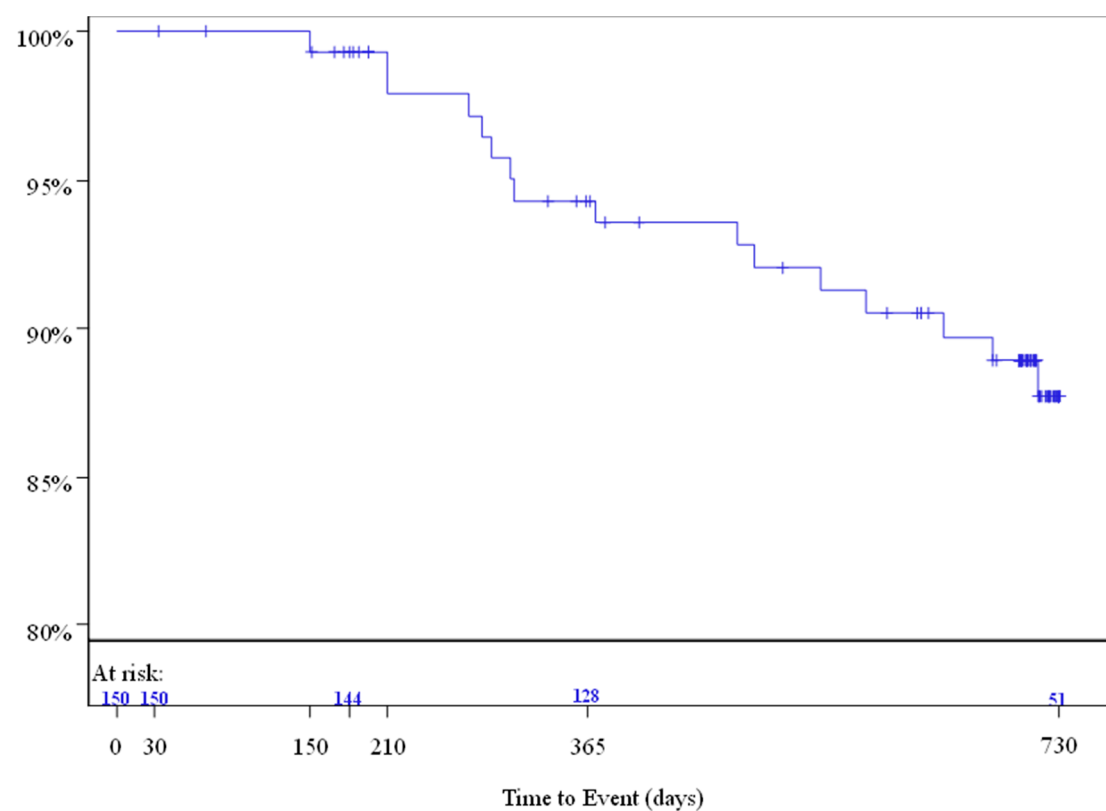

| Description         | Day 0               | Day 30              | Day 180           | Day 365           | Day 730           |
|---------------------|---------------------|---------------------|-------------------|-------------------|-------------------|
| At risk             | 150                 | 150                 | 144               | 128               | 51                |
| Events              | 0                   | 0                   | 1                 | 8                 | 16                |
| Censored            | 0                   | 0                   | 5                 | 14                | 85                |
| Survival (estimate) | 100.0 [100.0,100.0] | 100.0 [100.0,100.0] | 99.3 [95.3, 99.9] | 94.3 [88.9, 97.1] | 87.7 [80.5, 92.3] |
| SE                  | 0.00000             | 0.00000             | 0.00673           | 0.01962           | 0.02933           |

**Figure S3.** Kaplan Meier curve for freedom from major adverse events over 24 months.

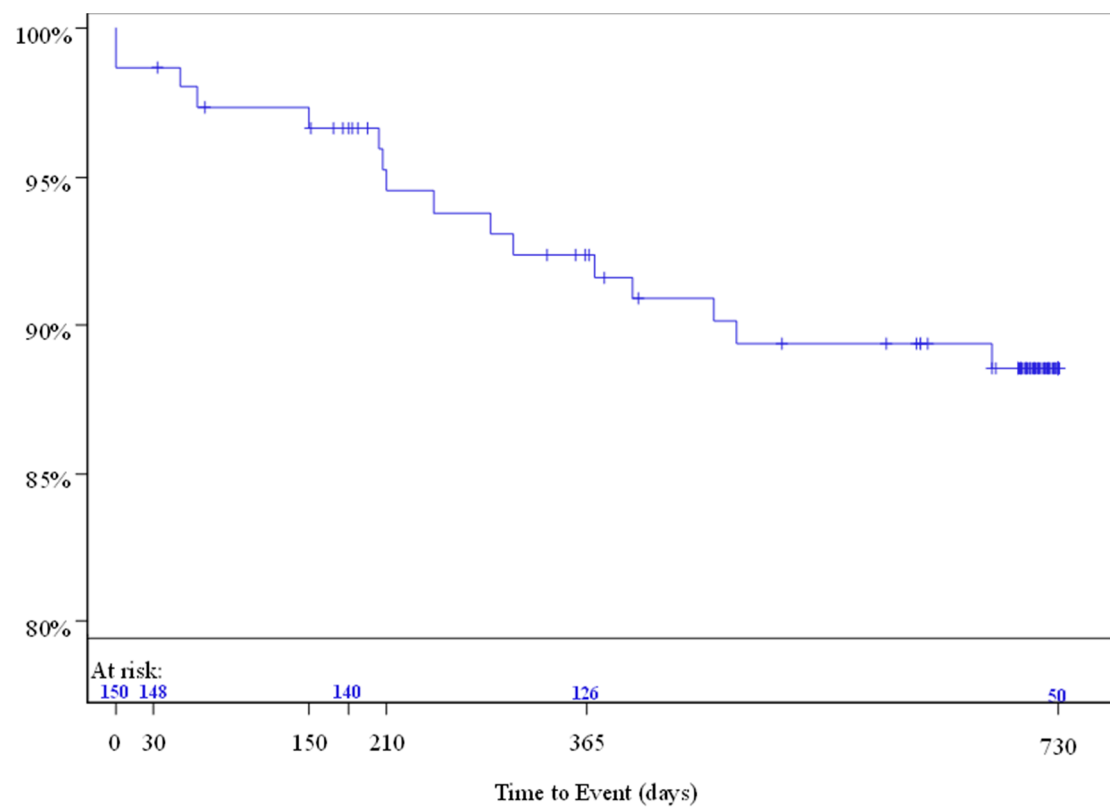

| Description         | Day 0             | Day 30            | Day 180           | Day 365           | Day 730           |
|---------------------|-------------------|-------------------|-------------------|-------------------|-------------------|
| At risk             | 150               | 148               | 140               | 126               | 50                |
| Events              | 2                 | 2                 | 5                 | 11                | 16                |
| Censored            | 0                 | 0                 | 5                 | 13                | 86                |
| Survival (estimate) | 98.7 [94.8, 99.7] | 98.7 [94.8, 99.7] | 96.6 [92.1, 98.6] | 92.4 [86.6, 95.7] | 88.6 [82.0, 92.8] |
| SE                  | 0.00937           | 0.00937           | 0.01474           | 0.02218           | 0.02696           |

**Figure S4.** Kaplan Meier curve for freedom from major adverse limb events over 24 months.

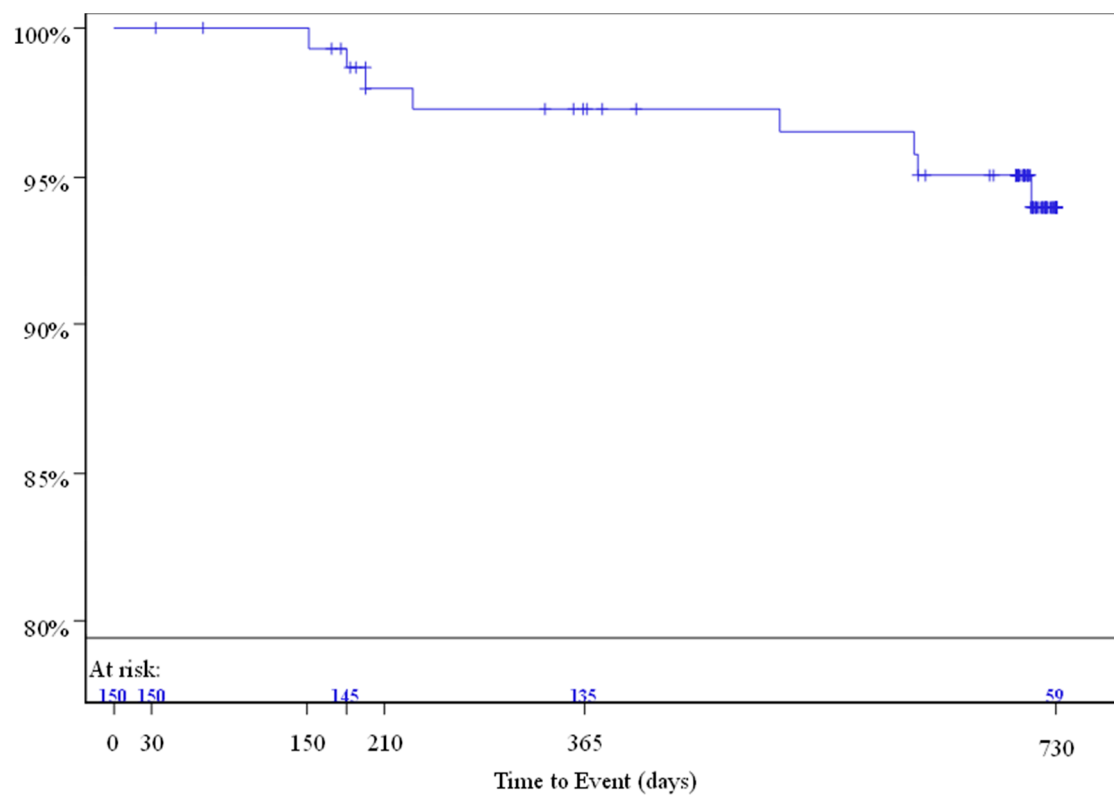

| Description         | Day 0               | Day 30              | Day 180           | Day 365           | Day 730           |
|---------------------|---------------------|---------------------|-------------------|-------------------|-------------------|
| At risk             | 150                 | 150                 | 145               | 135               | 59                |
| Events              | 0                   | 0                   | 1                 | 4                 | 8                 |
| Censored            | 0                   | 0                   | 4                 | 11                | 85                |
| Survival (estimate) | 100.0 [100.0,100.0] | 100.0 [100.0,100.0] | 99.3 [95.3, 99.9] | 97.2 [92.8, 99.0] | 94.0 [88.2, 97.0] |
| SE                  | 0.00000             | 0.00000             | 0.00673           | 0.01364           | 0.02102           |

**Figure S5.** Kaplan Meier curve for survival rate over 24 months.
